# Supplementary material
Source: PubMed Central journal article supplement (PMC3044981)
Supplement: supp_M110.189183_jbc.M110.189183-1.pdf [file supp_M110.189183_jbc.M110.189183-1.pdf]

# Supplementary Information

## For

### A Potential Biochemical Mechanism Underlying the Influence of Sterol Deprivation Stress on the *Caenorhabditis elegans* Longevity

Mi Cheong Cheong<sup>1</sup>, Keun Na<sup>1</sup>, Heekyeong Kim<sup>1</sup>, Seul-Ki Jeong<sup>1</sup>, Hyoe-Jin Joo<sup>1</sup>, David J. Chitwood<sup>2</sup> and  
Young-Ki Paik\*<sup>1</sup>

<sup>1</sup>Department of Biochemistry, College of Life Science and Biotechnology, Department of Biomedical Science, WCU Program of Graduate School and Yonsei Proteome Research Center, Yonsei University, Seoul, 120-749, Korea, <sup>2</sup>Nematology Laboratory, USDA, ARS, Bldg. 011A, Room 165-B, BARC-West, Beltsville, MD 20705 USA

\*To whom correspondence should be addressed. E-mail: [paikyk@yonsei.ac.kr](mailto:paikyk@yonsei.ac.kr)

Tel: +82-2-2123-4242; Fax: +82-2-393-6589

**Table S1.** DNA sequence information for qRT-PCR primers used in this experiment.

| Gene Name     | DNA sequence                                                                     |
|---------------|----------------------------------------------------------------------------------|
| <i>ins-1</i>  | (forward) 5'-ACTGGATTAACCGCTTTCAAAC-3'<br>(reverse) 5'-TCAATTATCGTCCTGATTGCAG-3' |
| <i>ins-7</i>  | (forward) 5'-TTGTGGAAAAGCATGCGAATC-3'<br>(reverse) 5'-TTAAGGACAGCACTGTTTTTCG-3'  |
| <i>ins-18</i> | (forward) 5'-ACGGACGCATGAAAATGTGC-3'<br>(reverse) 5'-TTGAAGTTGACGGATTGATGG-3'    |
| <i>daf-28</i> | (forward) 5'-TTCCGTATGTGTGGAGTGTC-3'<br>(reverse) 5'-TTTGTATATACTCGGCAGTGC-3'    |

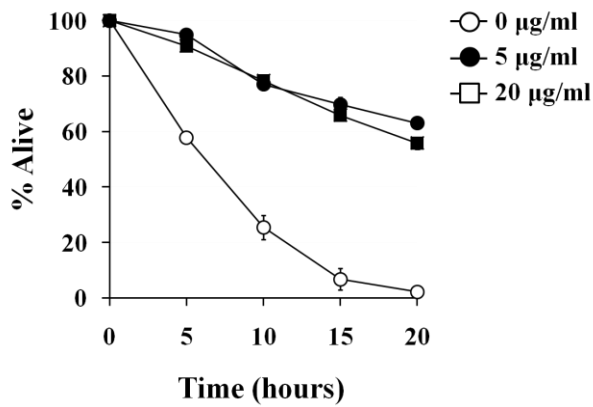

**Fig. S1. Cholesterol affects oxidative stress resistance.**

Cholesterol depletion cause decrease in the oxidative stress resistance in N2. Thirty worms grown on different concentration of cholesterol 0 µg/ml, 5 µg/ml and 20 µg/ml, were treated with paraquat, and the experiment was performed three times ( $p > 0.001$  at 20hr time point). Each point indicates mean value of three independent experiments ( $n=30$ ) and err bar is SEM.  $p$  values were derived from a Student's t-test.
